# Supplementary material
Source: PubMed Central journal article supplement (PMC2838541)
Supplement: ddq009_1.pdf [file ddq009_1.pdf]

**Supplementary material: A large replication study and meta-analysis in European samples provides further support for association of AHI1 markers with schizophrenia.**

Supplement 1: Sample description.

*Munich sample*

Healthy volunteers

Unrelated volunteers of German descent (i.e., both parents German) were randomly selected from the general population of Munich, Germany, and contacted by mail. To exclude subjects with central neurological diseases and psychotic disorders or subjects who had first-degree relatives with psychotic disorders, several screenings were conducted before the volunteers were enrolled in the study.

First, subjects who responded were initially screened by phone for the absence of neuropsychiatric disorders. Second, detailed medical and psychiatric histories were assessed for both themselves and their first-degree relatives by using a semi-structured interview. Third, if no exclusion criteria were fulfilled, they were invited to a comprehensive interview including the Structured Clinical Interview for DSM-IV (SCID<sup>1</sup> and SCID-II<sup>2</sup>) to validate the absence of any lifetime psychotic disorder. Fourth, the Family History Assessment Module<sup>3</sup> was conducted to exclude psychotic disorders among first-degree relatives. Finally, a neurological examination was conducted to exclude subjects with current CNS impairment. In the case that the volunteers were older than 60 years, the Mini Mental Status Test<sup>4</sup> was performed to exclude subjects with possible cognitive impairment.

Following the screening assessments, 1 272 control subjects (588 men and 684 women) were included. Further sample details are described elsewhere<sup>5</sup>.

Schizophrenic patients

We ascertained 495 individuals with schizophrenia (322 men and 173 women) from the Munich area in Germany. Of them, 66.3% were of German descent (i.e., both parents were German), and 33.7% were Caucasian of European descent. No evidence for ethnic stratification was observed after testing with the software STRUCTURE<sup>6</sup>. Subjects had a DSM-IV and ICD-10 diagnosis of schizophrenia of four subtypes: paranoid (78.2%), disorganized (15.4%), catatonic (2.0%), and undifferentiated (4.4%). Detailed medical and psychiatric histories were collected, including a clinical interview using the Structured Clinical Interview for DSM-IV (SCID), to evaluate lifetime Axis I and II diagnoses<sup>1,2</sup>. Four physicians and one psychologist rated the SCID interviews and all measurements were double-rated by a senior researcher. Exclusion criteria included a history of head injury or neurological diseases. All subjects were out-patients or stable in-patients. Further details are described elsewhere<sup>7</sup>.

A large part of the Munich sample has also been genotyped genome-wide, one part through the SGENE collaboration, and another part by Duke University on behalf of GlaxoSmithKline, made available to us through the extended SGENE+ consortium, see further details below.

### *SCOPE sample*

The Danish sample comprised 456 patients and 995 controls; 408 patients were affected with schizophrenia and 48 were affected with related psychoses. Patients were recruited to Danish Psychiatric Biobank from the psychiatric departments at the six hospitals in the Copenhagen region. The healthy controls subjects were recruited through the Danish Blood Donor Corps in the Copenhagen area. All subjects were of Caucasian origin with >0.9 probability determined by microsatellite genotypes<sup>8</sup>.

The Norwegian sample comprised 264 patients, affected with schizophrenia and related psychoses, and 181 controls. Patients were recruited from all the psychiatric hospitals in the Oslo area and diagnosed according to Structural Clinical Interview for DSM-IV (SCID). The healthy control subjects were randomly selected from statistical records of persons from the same catchment area as the patient groups. Only subjects born in Norway, all of Caucasian origin, were contacted by letter and invited to participate.

Detailed description of the SCOPE sample is provided elsewhere<sup>9</sup>.

### *SGENE+ sample*

The SGENE sample is composed of 1 433 schizophrenia patients and 33 250 control individuals from Iceland, Scotland, Germany, England and Wales, Italy, and Finland (<http://www.SGENE.eu>). The extended SGENE+ consortium includes, in addition to the SGENE sample, further samples from Aberdeen, Scotland and Munich, Germany, collected with support from GSK, as well as samples from Bonn, Germany, and Utrecht, Holland, in total 3 417 patients and 35 100 controls.

The Munich German part of the SGENE+ sample, 615 patients and 612 controls, overlaps to a large extent the Munich sample described above. We therefore omit the Munich part of the SGENE+ sample entirely from the analysis of *AHII* markers.

The 589 Icelandic patients of the SGENE+ sample are essentially the same as reported in Ingason *et al.*<sup>11</sup>, while the Icelandic SGENE+ controls are not the same. For the meta-analysis of the seven markers reported by Amann-Zalcenstein *et al.*<sup>10</sup> we choose to use the results from the Icelandic SGENE+ sample, as this includes many more controls (although, in this study we only use the 11 491 Icelandic controls that were typed on the HumanHap300 array out of the total of 32 443 Icelandic controls in the SGENE+ sample, this is done to avoid a systematic array effect as all the Icelandic patients are typed on the HumanHap300 array).

The remaining part of the SGENE+ sample includes 182 affected and 197 control individuals from Finland (part of the Finnish sample comes from a genetic isolate, and we therefore treat the Finnish sample as two separate samples in the meta-analysis); 84 and 89 from Italy; 93 and 88 from England and Wales; 658 and 661 from Aberdeen, Scotland; 483 and 367 from Bonn, Germany (the Bonn controls were derived from the German population-based Heinz Nixdorf Recall cohort); and 713 and 643 from Utrecht, Holland.

Thus, the SGENE+ sample investigated in the current study includes 2 802 patients and 13 536 controls. Detailed description of the SGENE+ samples is provided elsewhere<sup>12</sup>. Ethical approval was obtained from the local Ethics Committees. All participants gave written informed consent.

### *Cardiff University sample*

The case sample consisted of 642 unrelated subjects with schizophrenia (436 male and 206 female) of which 479 were used in the GWA study. All were white and born in the British Isles. All patients had a consensus diagnosis of schizophrenia according to DSMIV criteria made by two independent raters following a semi-structured interview by trained psychiatrists or psychologists using the Present State Examination<sup>13</sup> or the Schedules for Clinical Assessment in Neuropsychiatry (SCAN) interview<sup>14</sup> and review of case records. Cases were screened to exclude substance-induced psychotic disorder or psychosis due to a general medical condition. The mean age at first psychiatric contact was 23.8 (SD 7.9) years and the mean at ascertainment was 44.8 (SD 13.1) years. Multicentre and Local Research Ethics Committee approval were obtained, and all subjects gave written informed consent to participate.

The control sample used by the Wellcome Trust Case Control Consortium is described in detail elsewhere<sup>15</sup>. Briefly, controls (n= 2936) came from two sources, the 1958 British Birth Cohort (58C) and UK blood donors. At a genome wide level, the two groups do not significantly differ with respect to allele frequencies justifying their use as a single control group. Individuals included in the study were living within England, Scotland and Wales. Individuals (n=26) with non-Caucasian ancestry as determined by Multidimensional Scaling (MDS) were previously removed by the WTCCC from the sample.

### *Supplementary references*

- 1 First, M.B., Gibbon, M., Spitzer, R.L., Williams, J.B. (1995) Structured Clinical Interview for DSM-IV (SCID). New York, New York State Psychiatric Institute.
- 2 First, M.B., Spitzer, R.L., Gibbon, M., Williams, B.W., Benjamin, L. (1990) Structured Clinical Interview for DSM-IV Axis II Personality Disorders (SCID-II). New York, New York State Psychiatric Institute.
- 3 Rice, J.P., Reich, T., Bucholz, K.K., Neuman, R.J., Fishman, R., Rochberg, N., Hesselbrock, V.M., Nurnberger, J.I. Jr., Schuckit, M.A., Begleiter, H. (1995) Comparison of direct interview and family history diagnoses of alcohol dependence. *Alcohol. Clin. Exp. Res.*, **19**, 1018-1023.
- 4 Folstein, M.F., Folstein, S.E., McHugh, P.R. (1990) Mini-Mental-Status-Test. German Version: Kessler, J., Folstein, S.E., Denzler, P. Weinheim, Beltz.
- 5 Rujescu, D., Giegling, I., Gietl, A., Hartmann, A.M., Moller, H.J. (2003) A functional single nucleotide polymorphism (V158M) in the COMT gene is associated with aggressive personality traits. *Biol. Psychiatry*, **54**, 34-39.
- 6 Pritchard, J.K., Rosenberg, N.A. (1999) Use of unlinked genetic markers to detect population stratification in association studies. *Am. J. Hum. Genet.*, **65**, 220-228.

- 7 Van den Oord, E.J., Rujescu, D., Robles, J.R., Giegling, I., Birrell, C., Bukszár, J., Murrelle, L., Möller, H.J., Middleton, L., Muglia, P. (2006) Factor structure and external validity of the PANSS revisited. *Schizophr. Res.*, **82**, 213-223.
- 8 Pritchard, J.K., Stephens, M., Donnelly, P. (2000) Inference of population structure using multilocus genotype data. *Genetics*, **155**, 945-959.
- 9 Hansen, T., Olsen, L., Lindow, M., Jakobsen, K.D., Ullum, H., Jonsson, E., Andreassen, O.A., Djurovic, S., Melle, I., Agartz, I. *et al.* (2007) Brain expressed microRNAs implicated in schizophrenia etiology. *PLoS ONE*, **2**, e873.
- 10 Amann-Zalcenstein, D., Avidan, N., Kanyas, K., Ebstein, R.P., Kohn, Y., Hamdan, A., Ben-Asher, E., Karni, O., Mujaheed, M., Segman, R.H. *et al.* (2006) AHI1, a pivotal neurodevelopmental gene, and C6orf217 are associated with susceptibility to schizophrenia. *Eur. J. Hum. Genet.*, **14**, 1111-1119.
- 11 Ingason, A., Sigmundsson, T., Steinberg, S., Sigurdsson, E., Haraldsson, M., Magnusdottir, B.B., Frigge, M.L., Kong, A., Gulcher, J., Thorsteinsdottir, U. *et al.* (2007) Support for involvement of the AHI1 locus in schizophrenia. *Eur. J. Hum. Genet.*, **15**, 988-991.
- 12 Stefansson, H., Rujescu, D., Cichon, S., Pietiläinen, O.P., Ingason, A., Steinberg, S., Fossdal, R., Sigurdsson, E., Sigmundsson, T., Buizer-Voskamp, J.E. *et al.* (2008) Large recurrent microdeletions associated with schizophrenia. *Nature*, **455**, 232-236.
- 13 Wing, J.K., Cooper, J.E., Satorius, N. (1974) *The Measurement and Classification of Psychiatric illness*, Cambridge University Press, Cambridge.
- 14 Wing, J.K., Babor, T., Brugha, T., Burke, J., Cooper, J.E., Giel, R., Jablenski, A., Regier, D., Sartorius, N. (1990) SCAN. Schedules for Clinical Assessment in Neuropsychiatry. *Arch. Gen. Psychiatry*, **47**, 589-593.
- 15 Wellcome Trust Case Control Consortium. (2007) Genome-wide association study of 14,000 cases of seven common diseases and 3,000 shared controls. *Nature*, **447**, 661-678.

*Supplementary Table 1: Surrogate alleles typed in different samples and their correlation with original alleles*

| Original study <sup>1</sup> | Munich       |                | SCOPE       |                | SGENE+       |                | Cardiff     |                |
|-----------------------------|--------------|----------------|-------------|----------------|--------------|----------------|-------------|----------------|
|                             | Allele       | R <sup>2</sup> | Allele      | R <sup>2</sup> | Allele       | R <sup>2</sup> | Allele      | R <sup>2</sup> |
| rs9321501-A                 | rs9321501-A  | -              | rs9321501-A | -              | rs2064430-C  | 1              | rs2757649-A | 0.96           |
| rs11154801-C                | rs11154801-C | -              | rs7750586-A | 0.96           | rs11154801-C | -              | rs7750586-A | 0.96           |
| rs7750586-A                 | rs7750586-A  | -              | rs7750586-A | -              | rs11154801-C | 0.96           | rs7750586-A | -              |
| rs9647635-A                 | rs9647635-A  | -              | rs7750586-A | 1              | rs11154801-C | 0.96           | rs7750586-A | 1              |
| rs7739635-C                 | rs12196952-A | 0.85           | rs9494335-A | 0.81           | rs9321521-G  | 0.96           | rs9494322-C | 0.83           |
| rs9494332-A                 | rs9494332-A  | -              | rs9494335-A | 1              | rs10223338-C | 0.92           | rs9494322-C | 0.91           |
| rs1475069-A                 | rs1475069-A  | -              | rs9399158-C | 1              | rs1475069-A  | -              | rs9389329-C | 0.96           |

*The table shows correlation of surrogate alleles with original alleles in the Hapmap CEU population*

*(<http://www.hapmap.org>)*

<sup>1</sup>*The family study of Amann-Zalcenstein et al. (2006)*

*Supplementary Table 2: Surrogate markers and allele counts for sub-samples in the meta-analysis of alleles reported by Amann-Zalcenstein et al. (2006).*

| Study   | Sub-sample              | Allele | Marker            | R <sup>2</sup> | Affected     |                    | Controls     |                    |
|---------|-------------------------|--------|-------------------|----------------|--------------|--------------------|--------------|--------------------|
|         |                         |        |                   |                | Allele count | Other allele count | Allele count | Other allele count |
| Munich  | Germany - Munich        | A      | <b>rs9321501</b>  | -              | 565          | 425                | 1407         | 1137               |
| SCOPE   | Denmark                 | A      | <b>rs9321501</b>  | -              | 479          | 433                | 1055         | 935                |
| SCOPE   | Norway                  | A      | <b>rs9321501</b>  | -              | 277          | 251                | 191          | 171                |
| SGENE+  | Iceland                 | C      | rs2064430         | 1              | 659          | 517                | 12 076       | 10 832             |
| SGENE+  | England/Wales           | C      | rs2064430         | 1              | 110          | 72                 | 92           | 80                 |
| SGENE+  | Finland I <sup>1</sup>  | C      | rs2064430         | 1              | 68           | 50                 | 178          | 116                |
| SGENE+  | Finland II <sup>1</sup> | C      | rs2064430         | 1              | 145          | 97                 | 54           | 44                 |
| SGENE+  | Italy                   | C      | rs2064430         | 1              | 94           | 74                 | 111          | 67                 |
| SGENE+  | Holland                 | C      | rs2064430         | 1              | 819          | 607                | 669          | 613                |
| SGENE+  | Scotland                | C      | rs2064430         | 1              | 752          | 562                | 736          | 586                |
| SGENE+  | Germany – Bonn          | C      | rs2064430         | 1              | 525          | 441                | 378          | 356                |
| Cardiff | England/Wales           | A      | rs2757649         | 0.96           | 555          | 403                | 3275         | 2597               |
| Munich  | Germany – Munich        | C      | <b>rs11154801</b> | -              | 643          | 347                | 1643         | 901                |
| SCOPE   | Denmark                 | A      | rs7750586         | 0.96           | 593          | 319                | 1253         | 737                |
| SCOPE   | Norway                  | A      | rs7750586         | 0.96           | 333          | 195                | 229          | 133                |
| SGENE+  | Iceland                 | C      | <b>rs11154801</b> | -              | 807          | 371                | 15 222       | 7760               |
| SGENE+  | England/Wales           | C      | <b>rs11154801</b> | -              | 123          | 63                 | 115          | 61                 |
| SGENE+  | Finland I <sup>1</sup>  | C      | <b>rs11154801</b> | -              | 79           | 39                 | 201          | 93                 |
| SGENE+  | Finland II <sup>1</sup> | C      | <b>rs11154801</b> | -              | 181          | 65                 | 69           | 31                 |

|         |                         |   |                   |      |     |     |        |      |
|---------|-------------------------|---|-------------------|------|-----|-----|--------|------|
| SGENE+  | Italy                   | C | <b>rs11154801</b> | -    | 106 | 62  | 121    | 57   |
| SGENE+  | Holland                 | C | <b>rs11154801</b> | -    | 950 | 476 | 794    | 492  |
| SGENE+  | Scotland                | C | <b>rs11154801</b> | -    | 860 | 456 | 850    | 472  |
| SGENE+  | Germany – Bonn          | C | <b>rs11154801</b> | -    | 624 | 342 | 457    | 275  |
| Cardiff | England/Wales           | A | rs7750586         | 0.96 | 627 | 329 | 3727   | 2143 |
| Munich  | Germany – Munich        | A | <b>rs7750586</b>  | -    | 641 | 349 | 1638   | 906  |
| SCOPE   | Denmark                 | A | <b>rs7750586</b>  | -    | 593 | 319 | 1253   | 737  |
| SCOPE   | Norway                  | A | <b>rs7750586</b>  | -    | 333 | 195 | 229    | 133  |
| SGENE+  | Iceland                 | C | rs11154801        | 0.96 | 807 | 371 | 15 222 | 7760 |
| SGENE+  | England/Wales           | C | rs11154801        | 0.96 | 123 | 63  | 115    | 61   |
| SGENE+  | Finland I <sup>1</sup>  | C | rs11154801        | 0.96 | 79  | 39  | 201    | 93   |
| SGENE+  | Finland II <sup>1</sup> | C | rs11154801        | 0.96 | 181 | 65  | 69     | 31   |
| SGENE+  | Italy                   | C | rs11154801        | 0.96 | 106 | 62  | 121    | 57   |
| SGENE+  | Holland                 | C | rs11154801        | 0.96 | 950 | 476 | 794    | 492  |
| SGENE+  | Scotland                | C | rs11154801        | 0.96 | 860 | 456 | 850    | 472  |
| SGENE+  | Germany – Bonn          | C | rs11154801        | 0.96 | 624 | 342 | 457    | 275  |
| Cardiff | England/Wales           | A | <b>rs7750586</b>  | -    | 627 | 329 | 3727   | 2143 |
| Munich  | Germany – Munich        | A | <b>rs9647635</b>  | -    | 641 | 349 | 1639   | 905  |
| SCOPE   | Denmark                 | A | rs7750586         | 1    | 593 | 319 | 1253   | 737  |
| SCOPE   | Norway                  | A | rs7750586         | 1    | 333 | 195 | 229    | 133  |
| SGENE+  | Iceland                 | C | rs11154801        | 0.96 | 807 | 371 | 15 222 | 7760 |
| SGENE+  | England/Wales           | C | rs11154801        | 0.96 | 123 | 63  | 115    | 61   |
| SGENE+  | Finland I <sup>1</sup>  | C | rs11154801        | 0.96 | 79  | 39  | 201    | 93   |

|         |                         |          |                  |      |     |     |        |      |
|---------|-------------------------|----------|------------------|------|-----|-----|--------|------|
| SGENE+  | Finland II <sup>1</sup> | C        | rs11154801       | 0.96 | 181 | 65  | 69     | 31   |
| SGENE+  | Italy                   | C        | rs11154801       | 0.96 | 106 | 62  | 121    | 57   |
| SGENE+  | Holland                 | C        | rs11154801       | 0.96 | 950 | 476 | 794    | 492  |
| SGENE+  | Scotland                | C        | rs11154801       | 0.96 | 860 | 456 | 850    | 472  |
| SGENE+  | Germany – Bonn          | C        | rs11154801       | 0.96 | 624 | 342 | 457    | 275  |
| Cardiff | England/Wales           | A        | rs7750586        | 1    | 627 | 329 | 3727   | 2143 |
| Munich  | Germany – Munich        | A        | rs12196952       | 0.85 | 674 | 316 | 1676   | 868  |
| SCOPE   | Denmark                 | A        | rs9494335        | 0.81 | 612 | 300 | 1327   | 663  |
| SCOPE   | Norway                  | A        | rs9494335        | 0.81 | 340 | 188 | 245    | 117  |
| SGENE+  | Iceland                 | G        | rs9321521        | 0.96 | 828 | 342 | 15 045 | 7509 |
| SGENE+  | England/Wales           | G        | rs9321521        | 0.96 | 124 | 58  | 111    | 65   |
| SGENE+  | Finland I <sup>1</sup>  | G        | rs9321521        | 0.96 | 97  | 21  | 227    | 63   |
| SGENE+  | Finland II <sup>1</sup> | G        | rs9321521        | 0.96 | 195 | 47  | 79     | 19   |
| SGENE+  | Italy                   | G        | rs9321521        | 0.96 | 107 | 61  | 120    | 58   |
| SGENE+  | Holland                 | G        | rs9321521        | 0.96 | 950 | 472 | 781    | 499  |
| SGENE+  | Scotland                | G        | rs9321521        | 0.96 | 856 | 444 | 873    | 441  |
| SGENE+  | Germany – Bonn          | G        | rs9321521        | 0.96 | 604 | 362 | 447    | 285  |
| Cardiff | England/Wales           | C        | rs9494322        | 0.83 | 683 | 275 | 3968   | 1902 |
| Munich  | Germany – Munich        | <b>A</b> | <b>rs9494332</b> | -    | 670 | 320 | 1647   | 897  |
| SCOPE   | Denmark                 | A        | rs9494335        | 1    | 612 | 300 | 1327   | 663  |
| SCOPE   | Norway                  | A        | rs9494335        | 1    | 340 | 188 | 245    | 117  |
| SGENE+  | Iceland                 | C        | rs10223338       | 0.92 | 859 | 319 | 16 016 | 6940 |
| SGENE+  | England/Wales           | C        | rs10223338       | 0.92 | 131 | 55  | 124    | 52   |

|         |                         |   |                  |      |      |     |        |      |
|---------|-------------------------|---|------------------|------|------|-----|--------|------|
| SGENE+  | Finland I <sup>1</sup>  | C | rs10223338       | 0.92 | 98   | 20  | 232    | 62   |
| SGENE+  | Finland II <sup>1</sup> | C | rs10223338       | 0.92 | 198  | 46  | 81     | 19   |
| SGENE+  | Italy                   | C | rs10223338       | 0.92 | 119  | 49  | 132    | 46   |
| SGENE+  | Holland                 | C | rs10223338       | 0.92 | 1019 | 407 | 855    | 429  |
| SGENE+  | Scotland                | C | rs10223338       | 0.92 | 927  | 385 | 931    | 391  |
| SGENE+  | Germany – Bonn          | C | rs10223338       | 0.92 | 653  | 309 | 492    | 242  |
| Cardiff | England/Wales           | C | rs9494322        | 0.91 | 683  | 275 | 3968   | 1902 |
| Munich  | Germany – Munich        | A | <b>rs1475069</b> | -    | 711  | 279 | 1719   | 825  |
| SCOPE   | Denmark                 | C | rs9399158        | 1    | 621  | 291 | 1373   | 617  |
| SCOPE   | Norway                  | C | rs9399158        | 1    | 355  | 173 | 251    | 111  |
| SGENE+  | Iceland                 | A | <b>rs1475069</b> | -    | 871  | 303 | 15 955 | 6883 |
| SGENE+  | England/Wales           | A | <b>rs1475069</b> | -    | 136  | 50  | 126    | 50   |
| SGENE+  | Finland I <sup>1</sup>  | A | <b>rs1475069</b> | -    | 97   | 19  | 230    | 62   |
| SGENE+  | Finland II <sup>1</sup> | A | <b>rs1475069</b> | -    | 200  | 46  | 81     | 19   |
| SGENE+  | Italy                   | A | <b>rs1475069</b> | -    | 122  | 46  | 119    | 53   |
| SGENE+  | Holland                 | A | <b>rs1475069</b> | -    | 1029 | 395 | 861    | 423  |
| SGENE+  | Scotland                | A | <b>rs1475069</b> | -    | 918  | 392 | 933    | 389  |
| SGENE+  | Germany - Bonn          | A | <b>rs1475069</b> | -    | 658  | 308 | 501    | 227  |
| Cardiff | England/Wales           | C | rs9389329        | 0.96 | 654  | 298 | 3926   | 1942 |

*The original alleles/markers of Amann-Zalcenstein et al. (2006) are designated in bold; rs7739635 is not directly typed in any sub-sample. The R<sup>2</sup> column shows the correlation (R<sup>2</sup>) of surrogate markers with the original markers in the Hapmap CEU sample (<http://www.hapmap.org>).*

<sup>1</sup>*Part of the Finnish SGENE+ sample comes from a genetic isolate, we therefore treat it as a separate sample in the meta-analysis; Finland I = general population, Finland II = genetic isolate.*

*Supplementary table 3: Probabilities for Hardy-Weinberg distribution of genotypes in subsamples.*

| Munich     |                            |     |     |     |      |                             |     |     |     |      |
|------------|----------------------------|-----|-----|-----|------|-----------------------------|-----|-----|-----|------|
|            | Affected genotypes (N=495) |     |     |     |      | Controls genotypes (N=1272) |     |     |     |      |
| Marker     | 1-1                        | 1-2 | 2-2 | X2  | P    | 1-1                         | 1-2 | 2-2 | X2  | P    |
| rs9321501  | 152                        | 261 | 83  | 2.7 | 0.10 | 403                         | 601 | 268 | 2.5 | 0.11 |
| rs11154801 | 55                         | 237 | 204 | 1.3 | 0.26 | 162                         | 574 | 534 | 0.2 | 0.69 |
| rs7750586  | 203                        | 237 | 56  | 1.1 | 0.29 | 529                         | 578 | 163 | 0.1 | 0.79 |
| rs9647635  | 203                        | 237 | 56  | 1.1 | 0.29 | 531                         | 577 | 164 | 0.1 | 0.71 |
| rs12196952 | 229                        | 218 | 49  | 0.1 | 0.78 | 548                         | 580 | 144 | 0.3 | 0.61 |
| rs9494332  | 226                        | 220 | 50  | 0.1 | 0.74 | 530                         | 585 | 156 | 0.1 | 0.78 |
| rs1475069  | 251                        | 188 | 42  | 0.6 | 0.43 | 549                         | 519 | 115 | 0.2 | 0.63 |

  

| SCOPE – Denmark |                            |     |     |     |      |                            |     |     |     |       |
|-----------------|----------------------------|-----|-----|-----|------|----------------------------|-----|-----|-----|-------|
|                 | Affected genotypes (N=456) |     |     |     |      | Controls genotypes (N=995) |     |     |     |       |
| Marker          | 1-1                        | 1-2 | 2-2 | X2  | P    | 1-1                        | 1-2 | 2-2 | X2  | P     |
| rs9321501       | 130                        | 214 | 108 | 1.2 | 0.28 | 276                        | 498 | 210 | 0.3 | 0.60  |
| rs7750586       | 195                        | 200 | 57  | 0.3 | 0.61 | 384                        | 474 | 126 | 1.2 | 0.28  |
| rs9494335       | 205                        | 172 | 59  | 5.4 | 0.02 | 436                        | 395 | 119 | 3.9 | 0.048 |
| rs9399158       | 213                        | 178 | 53  | 2.7 | 0.10 | 477                        | 405 | 103 | 1.5 | 0.22  |

  

| SCOPE – Norway |                            |     |     |     |      |                            |     |     |     |       |
|----------------|----------------------------|-----|-----|-----|------|----------------------------|-----|-----|-----|-------|
|                | Affected genotypes (N=264) |     |     |     |      | Controls genotypes (N=181) |     |     |     |       |
| Marker         | 1-1                        | 1-2 | 2-2 | X2  | P    | 1-1                        | 1-2 | 2-2 | X2  | P     |
| rs9321501      | 68                         | 129 | 59  | 0   | 0.88 | 53                         | 75  | 42  | 2.2 | 0.14  |
| rs7750586      | 93                         | 104 | 34  | 0.3 | 0.58 | 67                         | 57  | 25  | 4.2 | 0.039 |

|           |     |     |    |     |       |    |    |    |     |       |
|-----------|-----|-----|----|-----|-------|----|----|----|-----|-------|
| rs9494335 | 108 | 111 | 38 | 1.2 | 0.28  | 81 | 66 | 20 | 1.3 | 0.26  |
| rs9399158 | 119 | 100 | 34 | 3   | 0.083 | 88 | 62 | 20 | 2.9 | 0.086 |

SGENE+ - Scotland

| Marker     | Affected genotypes (N=662) |     |     |     |      | Controls genotypes (N=670) |     |     |     |        |
|------------|----------------------------|-----|-----|-----|------|----------------------------|-----|-----|-----|--------|
|            | 1-1                        | 1-2 | 2-2 | X2  | P    | 1-1                        | 1-2 | 2-2 | X2  | P      |
| rs10223338 | 322                        | 283 | 51  | 1.1 | 0.30 | 337                        | 257 | 67  | 2.9 | 0.087  |
| rs11154801 | 71                         | 314 | 273 | 1.9 | 0.17 | 99                         | 274 | 288 | 6.2 | 0.013  |
| rs1475069  | 319                        | 280 | 56  | 0.2 | 0.62 | 345                        | 243 | 73  | 8.7 | 0.0031 |
| rs2064430  | 215                        | 322 | 120 | 0.0 | 0.98 | 212                        | 312 | 137 | 1.3 | 0.26   |
| rs9321521  | 72                         | 300 | 278 | 0.4 | 0.51 | 85                         | 271 | 301 | 3.7 | 0.054  |

SGENE+ - Germany (Bonn)

| Marker     | Affected genotypes (N=491) |     |     |     |      | Controls genotypes (N=383) |     |     |     |       |
|------------|----------------------------|-----|-----|-----|------|----------------------------|-----|-----|-----|-------|
|            | 1-1                        | 1-2 | 2-2 | X2  | P    | 1-1                        | 1-2 | 2-2 | X2  | P     |
| rs10223338 | 219                        | 215 | 47  | 0.3 | 0.58 | 169                        | 154 | 44  | 0.9 | 0.33  |
| rs11154801 | 58                         | 226 | 199 | 0.3 | 0.61 | 59                         | 157 | 150 | 2.7 | 0.10  |
| rs1475069  | 225                        | 208 | 50  | 0.0 | 0.85 | 175                        | 151 | 38  | 0.4 | 0.52  |
| rs2064430  | 147                        | 231 | 105 | 0.6 | 0.43 | 109                        | 160 | 98  | 5.9 | 0.015 |
| rs9321521  | 64                         | 234 | 185 | 0.6 | 0.46 | 60                         | 165 | 141 | 1.0 | 0.32  |

SGENE+ - the UK

| Marker     | Affected genotypes (N=104) |     |     |     |      | Controls genotypes (N=95) |     |     |     |       |
|------------|----------------------------|-----|-----|-----|------|---------------------------|-----|-----|-----|-------|
|            | 1-1                        | 1-2 | 2-2 | X2  | P    | 1-1                       | 1-2 | 2-2 | X2  | P     |
| rs10223338 | 49                         | 33  | 11  | 2.0 | 0.15 | 46                        | 32  | 10  | 1.4 | 0.24  |
| rs11154801 | 9                          | 45  | 39  | 0.6 | 0.44 | 7                         | 47  | 34  | 2.8 | 0.093 |

|           |    |    |    |     |       |    |    |    |     |      |
|-----------|----|----|----|-----|-------|----|----|----|-----|------|
| rs1475069 | 52 | 32 | 9  | 1.4 | 0.23  | 46 | 34 | 8  | 0.2 | 0.64 |
| rs2064430 | 34 | 42 | 15 | 0.1 | 0.74  | 24 | 44 | 18 | 0.1 | 0.79 |
| rs9321521 | 14 | 30 | 47 | 5.3 | 0.022 | 12 | 41 | 35 | 0.0 | 1    |

SGENE+ - Finland (General Population)

| Marker     | Affected genotypes (N=63) |     |     |     |      | Controls genotypes (N=150) |     |     |     |       |
|------------|---------------------------|-----|-----|-----|------|----------------------------|-----|-----|-----|-------|
|            | 1-1                       | 1-2 | 2-2 | X2  | P    | 1-1                        | 1-2 | 2-2 | X2  | P     |
| rs10223338 | 40                        | 18  | 1   | 0.4 | 0.52 | 91                         | 50  | 6   | 0.1 | 0.79  |
| rs11154801 | 5                         | 29  | 25  | 0.7 | 0.40 | 14                         | 65  | 68  | 0.1 | 0.79  |
| rs1475069  | 40                        | 17  | 1   | 0.3 | 0.59 | 94                         | 42  | 10  | 2.9 | 0.091 |
| rs2064430  | 18                        | 32  | 9   | 0.7 | 0.40 | 52                         | 74  | 21  | 0.4 | 0.52  |
| rs9321521  | 1                         | 19  | 39  | 0.6 | 0.44 | 7                          | 49  | 89  | 0.0 | 0.94  |

SGENE+ - Finland (Genetic Isolate)

| Marker     | Affected genotypes (N=128) |     |     |     |      | Controls genotypes (N=50) |     |     |     |       |
|------------|----------------------------|-----|-----|-----|------|---------------------------|-----|-----|-----|-------|
|            | 1-1                        | 1-2 | 2-2 | X2  | P    | 1-1                       | 1-2 | 2-2 | X2  | P     |
| rs10223338 | 81                         | 36  | 5   | 0.2 | 0.69 | 31                        | 19  | 0   | 2.8 | 0.097 |
| rs11154801 | 7                          | 51  | 65  | 0.5 | 0.46 | 4                         | 23  | 23  | 0.3 | 0.59  |
| rs1475069  | 83                         | 34  | 6   | 1.0 | 0.31 | 31                        | 19  | 0   | 2.8 | 0.097 |
| rs2064430  | 44                         | 57  | 20  | 0.0 | 0.83 | 14                        | 26  | 9   | 0.3 | 0.61  |
| rs9321521  | 5                          | 37  | 79  | 0.1 | 0.80 | 0                         | 19  | 30  | 2.8 | 0.092 |

SGENE+ - Iceland

| Marker     | Affected genotypes (N=612) |     |     |     |      | Controls genotypes (N=11492) |      |      |     |        |
|------------|----------------------------|-----|-----|-----|------|------------------------------|------|------|-----|--------|
|            | 1-1                        | 1-2 | 2-2 | X2  | P    | 1-1                          | 1-2  | 2-2  | X2  | P      |
| rs10223338 | 308                        | 243 | 38  | 1.2 | 0.28 | 5655                         | 4706 | 1117 | 9.0 | 0.0026 |

|            |     |     |     |     |      |      |      |      |     |       |
|------------|-----|-----|-----|-----|------|------|------|------|-----|-------|
| rs11154801 | 54  | 263 | 272 | 0.7 | 0.40 | 1339 | 5082 | 5070 | 1.5 | 0.23  |
| rs1475069  | 318 | 235 | 34  | 1.2 | 0.27 | 5612 | 4731 | 1076 | 3.0 | 0.085 |
| rs2064430  | 184 | 291 | 113 | 0.0 | 0.91 | 3186 | 5704 | 2564 | 0.0 | 0.91  |
| rs9321521  | 46  | 250 | 289 | 0.6 | 0.43 | 1294 | 4921 | 5062 | 3.5 | 0.062 |

#### SGENE+ - Italy

| Marker     | Affected genotypes (N=86) |     |     |     |      | Controls genotypes (N=91) |     |     |     |      |
|------------|---------------------------|-----|-----|-----|------|---------------------------|-----|-----|-----|------|
|            | 1-1                       | 1-2 | 2-2 | X2  | P    | 1-1                       | 1-2 | 2-2 | X2  | P    |
| rs10223338 | 43                        | 33  | 8   | 0.2 | 0.65 | 51                        | 30  | 8   | 1.3 | 0.26 |
| rs11154801 | 12                        | 38  | 34  | 0.1 | 0.79 | 11                        | 35  | 43  | 0.8 | 0.36 |
| rs1475069  | 46                        | 30  | 8   | 0.9 | 0.35 | 43                        | 33  | 10  | 0.9 | 0.35 |
| rs2064430  | 26                        | 42  | 16  | 0.0 | 0.90 | 36                        | 39  | 14  | 0.4 | 0.53 |
| rs9321521  | 12                        | 37  | 35  | 0.2 | 0.66 | 11                        | 36  | 42  | 0.6 | 0.45 |

#### SGENE+ - Holland

| Marker     | Affected genotypes (N=713) |     |     |     |       | Controls genotypes (N=643) |     |     |     |       |
|------------|----------------------------|-----|-----|-----|-------|----------------------------|-----|-----|-----|-------|
|            | 1-1                        | 1-2 | 2-2 | X2  | P     | 1-1                        | 1-2 | 2-2 | X2  | P     |
| rs10223338 | 359                        | 301 | 53  | 0.9 | 0.35  | 275                        | 305 | 62  | 2.9 | 0.086 |
| rs11154801 | 66                         | 344 | 303 | 5.1 | 0.024 | 87                         | 318 | 238 | 1.4 | 0.23  |
| rs1475069  | 368                        | 293 | 51  | 0.5 | 0.48  | 286                        | 289 | 67  | 0.2 | 0.63  |
| rs2064430  | 229                        | 361 | 123 | 0.9 | 0.34  | 164                        | 341 | 136 | 2.8 | 0.095 |
| rs9321521  | 74                         | 324 | 313 | 0.5 | 0.46  | 94                         | 311 | 235 | 0.3 | 0.59  |

#### Cardiff

| Marker | Affected genotypes (N=479) |     |     |    |   | Controls genotypes (N=2937) |     |     |    |   |
|--------|----------------------------|-----|-----|----|---|-----------------------------|-----|-----|----|---|
|        | 1-1                        | 1-2 | 2-2 | X2 | P | 1-1                         | 1-2 | 2-2 | X2 | P |

|           |     |     |    |     |      |      |      |     |     |      |
|-----------|-----|-----|----|-----|------|------|------|-----|-----|------|
| rs2757649 | 167 | 221 | 91 | 1.4 | 0.24 | 914  | 1447 | 575 | 0.0 | 0.96 |
| rs7750586 | 211 | 205 | 62 | 1.2 | 0.27 | 1189 | 1349 | 397 | 0.2 | 0.64 |
| rs9494322 | 250 | 183 | 46 | 2.1 | 0.14 | 1329 | 1310 | 296 | 1.0 | 0.31 |
| rs9389329 | 225 | 204 | 47 | 0.0 | 0.94 | 1297 | 1332 | 305 | 1.9 | 0.17 |
